# Supplementary material
Source: PubMed Central journal article supplement (PMC6310090)
Supplement: NIHMS1504975-supplement-Supplemental_Digital_Content_1.pdf [file NIHMS1504975-supplement-Supplemental_Digital_Content_1.pdf]

**Appendix 1: Univariate Associations of Patient and Surgical Variables with Permanent Implant Removal**

| <b>Confounding Variable</b>                                                                                     | <b>Odds Ratio</b> | <b>Confidence Interval</b> | <b>p-value</b> |
|-----------------------------------------------------------------------------------------------------------------|-------------------|----------------------------|----------------|
| Age                                                                                                             | 0.99              | [0.94, 1.05]               | 0.79           |
| BMI                                                                                                             | 0.98              | [0.89, 1.09]               | 0.75           |
| DM                                                                                                              | 0.00              | [0.00, 0.00]               | 0.99           |
| Smoking Status                                                                                                  | 1.14              | [0.57, 2.28]               | 0.72           |
| Stage                                                                                                           | 1.05              | [0.62, 1.79]               | 0.86           |
| Radiation                                                                                                       | 1.41              | [0.32, 6.27]               | 0.65           |
| Chemotherapy                                                                                                    | 1.18              | [0.53, 2.64]               | 0.68           |
| Immediate v. Delayed Recon.                                                                                     | 1.00              | [0.08, 11.93]              | 1.00           |
| ADM used                                                                                                        | 0.41              | [0.10, 1.69]               | 0.22           |
| TE Removed v. Salvaged                                                                                          | 1.21              | [0.27, 5.49]               | 0.80           |
| Removed for infection                                                                                           | 2.44              | [0.59, 10.04]              | 0.22           |
| Removed for Mastectomy Flap<br>Necrosis                                                                         | 3.45              | [0.50, 23.94]              | 0.21           |
| Removed for Rupture, Leak, or<br>Deflation                                                                      | 0.94              | [0.22, 4.01]               | 0.94           |
| BMI = Body Mass Index, DM = Diabetes mellitus, v. = versus, ADM = Acellular Dermal Matrix, TE = Tissue Expander |                   |                            |                |
